# Supplementary material for: Immunohistochemical Analysis of Histone H3 Modification in Newt Tail Tissue Cells following Amputation
Source: Hindawi journal article supplement (doi:10.1155/2021/8828931), 2021-01-05

# **Immunohistochemical analysis of histone H3 modification in newt tail tissue cells following amputation**

Jiwen Wu<sup>1,2,3</sup>, Xu Zhang<sup>1</sup>, Sekiya Reiko<sup>1</sup>, Kiyoshi Aoyagi<sup>3</sup>, Tao-Sheng Li<sup>1\*</sup>

<sup>1</sup>Department of Stem Cell Biology, Atomic Bomb Disease Institute, Nagasaki University,  
Nagasaki, 852-8523, Japan

<sup>2</sup>Department of Human Anatomy, Histology and Embryology, School of Basic Medical  
Sciences, Fujian Medical University, Fuzhou, 350108, China

<sup>3</sup>Department of Public Health, Nagasaki University Graduate School of Biomedical Sciences,  
Nagasaki, 852-8523, Japan

## **\*Corresponding author:**

Tao-Sheng Li, MD, Ph.D.

Department of Stem Cell Biology,

Atomic Bomb Disease Institute,

Nagasaki University,

1-12-4 Sakamoto, Nagasaki 852-8523, Japan.

Tel: +81-95-819-7099; Fax: +81-95-819-7100. E-mail: [litaoshe@nagasaki-u.ac.jp](mailto:litaoshe@nagasaki-u.ac.jp)

## Supplemental information

**Supplementary Figure 1.** Schematic diagram on tissue sampling for experiments.

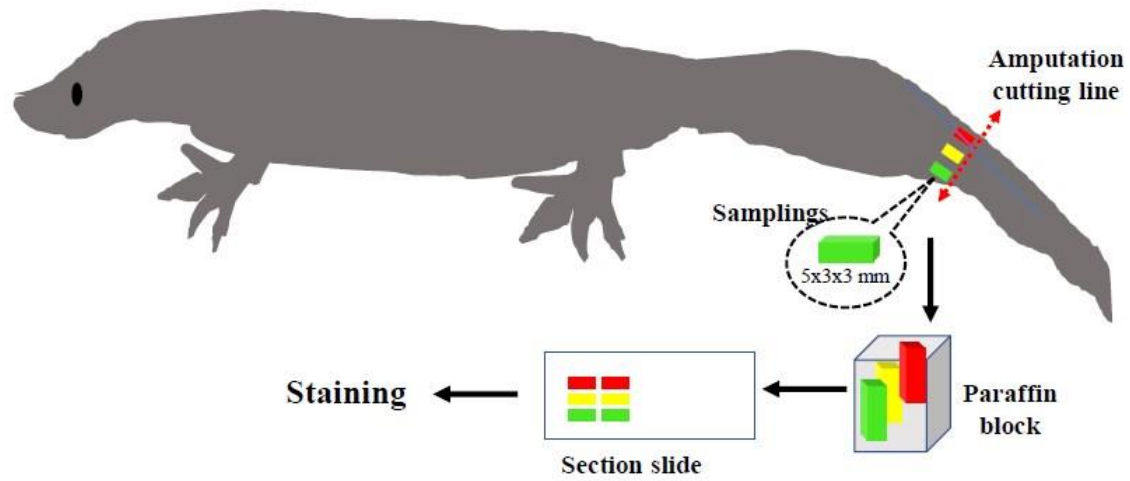

**Supplementary Figure 2.** Immunohistochemical analysis on the expression of acetylated H3K9 (AcH3K9) in tissue cells 3 days after amputation. Representative images display in grayscale.

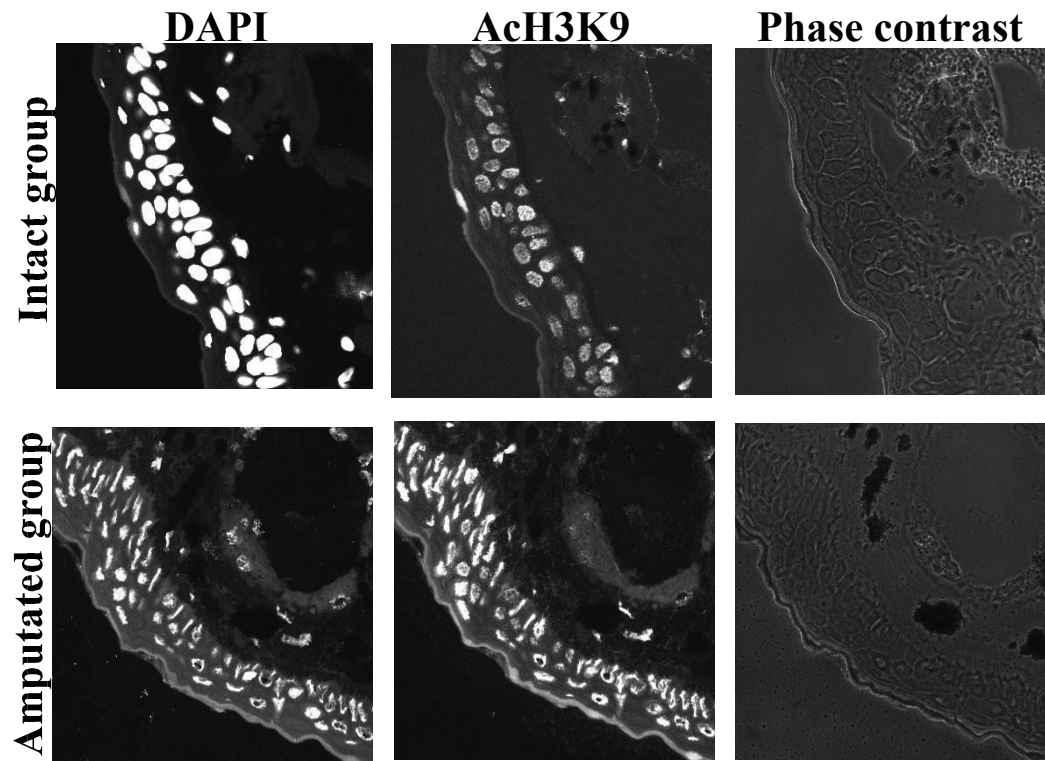

---

**Supplementary Figure 3.** Immunohistochemical analysis the expression of acetylated H3K14 (AcH3K14) in tissue cells 3 days after amputation. Representative images display in grayscale.

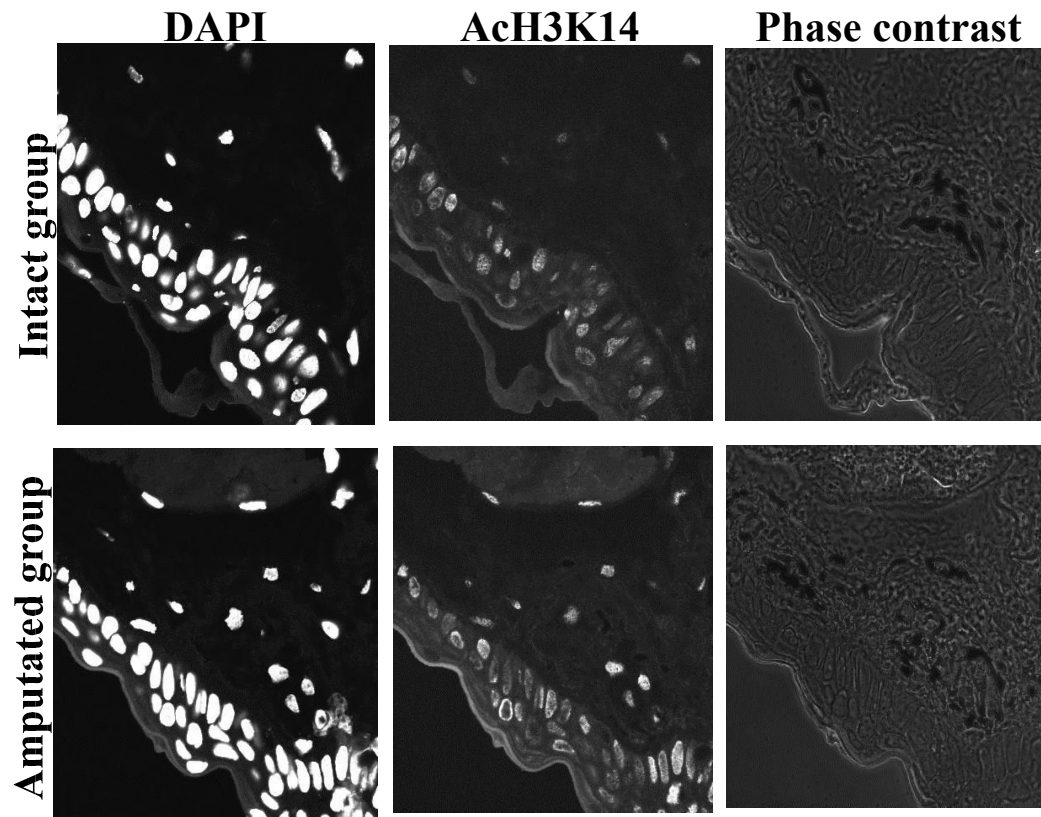

---

**Supplementary Figure 4.** Immunohistochemical analysis on the expression of acetylated H3K27 (AcH3K27) in tissue cells 3 days after amputation. Representative images display in grayscale.

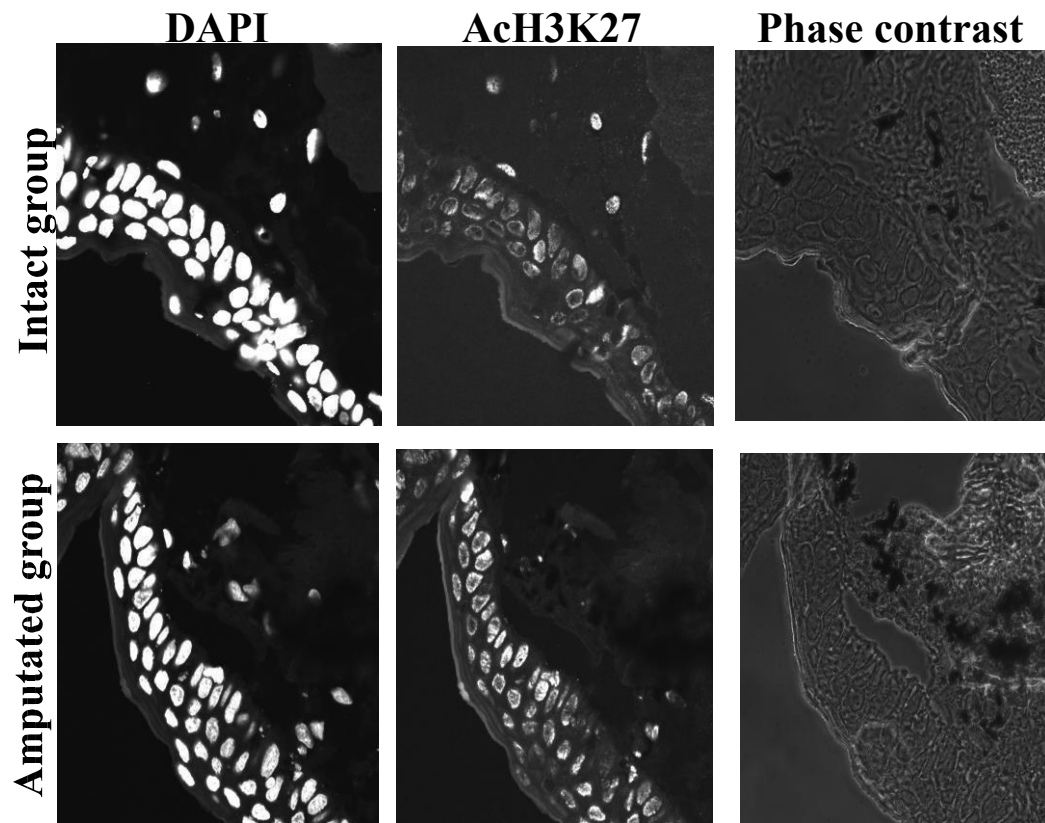

**Supplementary Figure 5.** Immunohistochemical analysis on the expression of methylated H3K14 (MeH3K27) in tissue cells 3 days after amputation. Representative images display in grayscale.

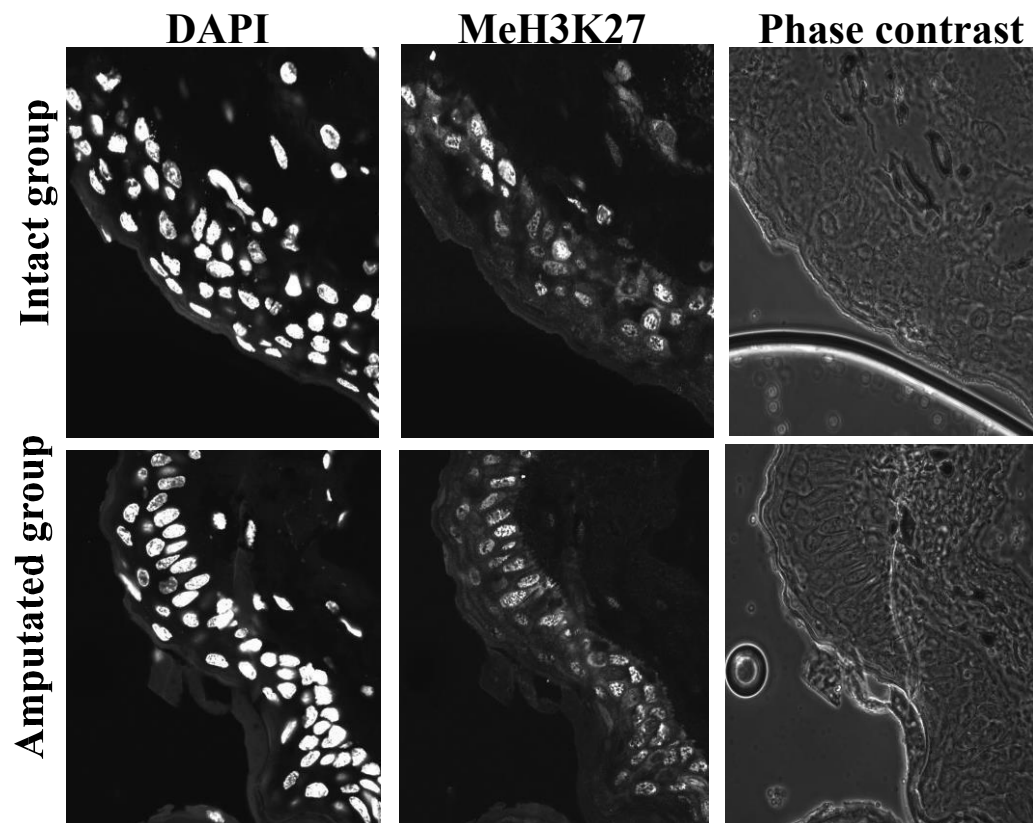

Supplement: f1 [file 8828931.f1.pdf]
